# Supplementary material for: Rates of SARS-CoV-2 transmission and vaccination impact the fate of vaccine-resistant strains
Source: PubMed Central journal article supplement (PMC8324827; doi:10.1038/s41598-021-95025-3), 2021-07-30
Supplement: 41598_2021_95025_MOESM1_ESM.pdf [file 41598_2021_95025_MOESM1_ESM.pdf]

## **Rates of SARS-CoV-2 transmission and vaccination impact the fate of vaccine-resistant strains**

Simon A. Rella<sup>1</sup>, Yuliya A. Kulikova<sup>2</sup>, Emmanouil T. Dermitzakis<sup>3\*</sup>, Fyodor A. Kondrashov<sup>1\*</sup>

<sup>1</sup>*Institute of Science and Technology Austria, 1 Am Campus, Klosterneuburg, 3400, Austria*

<sup>2</sup>*Banco de España, Calle Alcalá 48, 28014 Madrid, Spain*

<sup>3</sup>*Department of Genetic Medicine and Development, University of Geneva Medical School, Geneva, Switzerland*

\*Corresponding authors, ETD [Emmanouil.Dermitzakis@unige.ch](mailto:Emmanouil.Dermitzakis@unige.ch), FAK [fyodor.kondrashov@ist.ac.at](mailto:fyodor.kondrashov@ist.ac.at)

**Supplementary Figures and Legends**

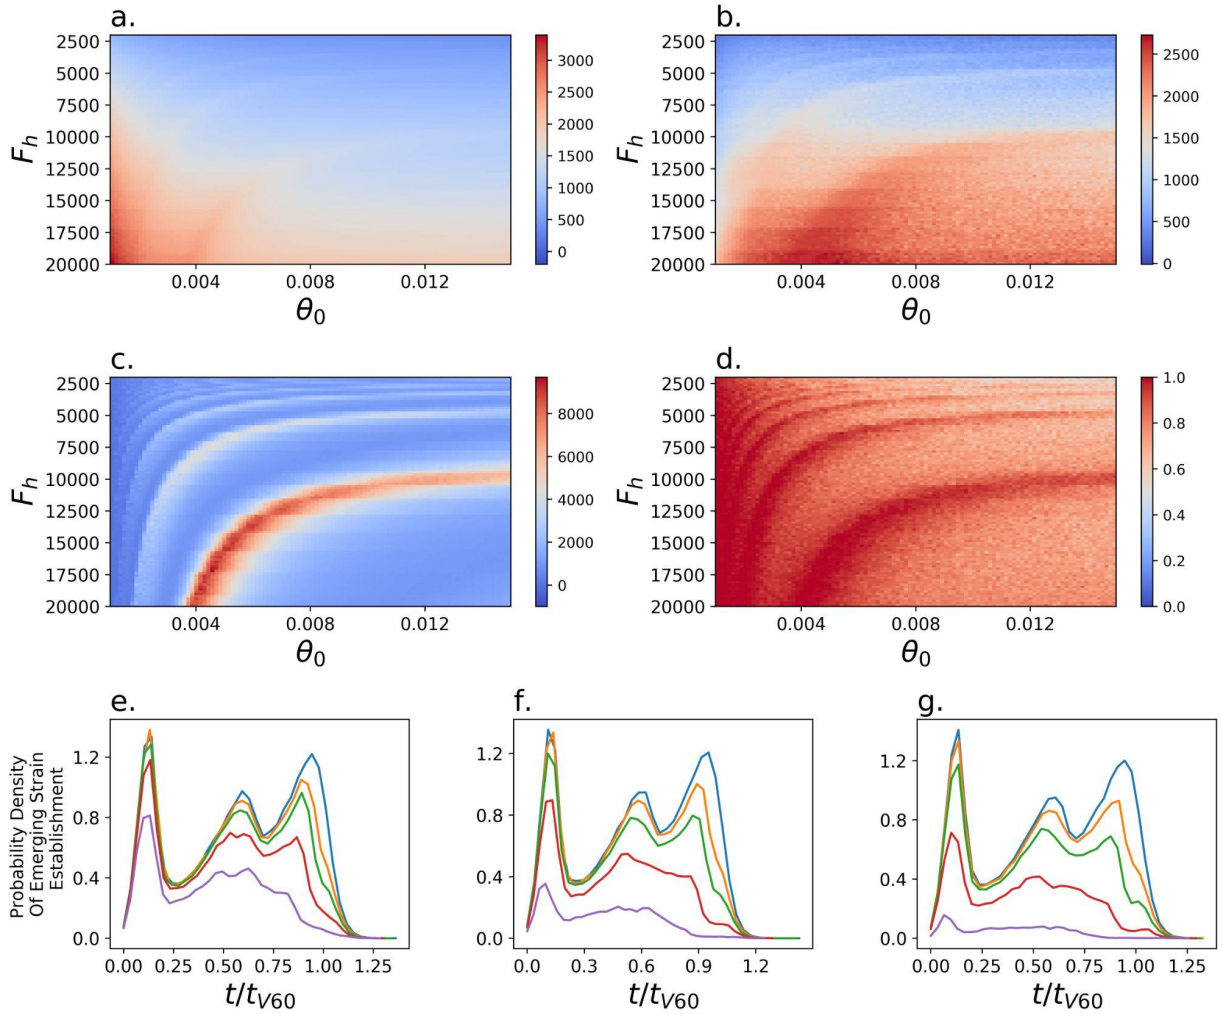

**Figure S1 Impact of the rate of vaccination and initiation of low rate of transmission on model dynamics for  $p = 10^{-5}$ .** The cumulative death rate from the **a**, wildtype and **b**, resistant strains, **c**, the number of wildtype-strain infected individuals at  $t_{v60}$ , the point in time when 60% of the population is vaccinated and **d**, the probability of resistant strain establishment. **e-g**, Probability density that the resistant strain emerges as a function of time since the start of the simulation,  $t$ , rescaled by the time at which 60% of the individuals are vaccinated,  $t_{v60}$ , summed across simulations with  $\theta$  (0.001 through 0.015),  $F_h$  (2,000 through 20,000). The impact of the extraordinary low transmission period centered at  $t/t_{v60} = 1$  on the likelihood of emergence of the resistant strain as a function of the duration of that period,  $T$  (colour-coded), and the intensity of the reduction of transmission **e**,  $\beta_i = 0.055$ , **f**,  $\beta_i = 0.03$ , **g**,  $\beta_i = 0.01$ .

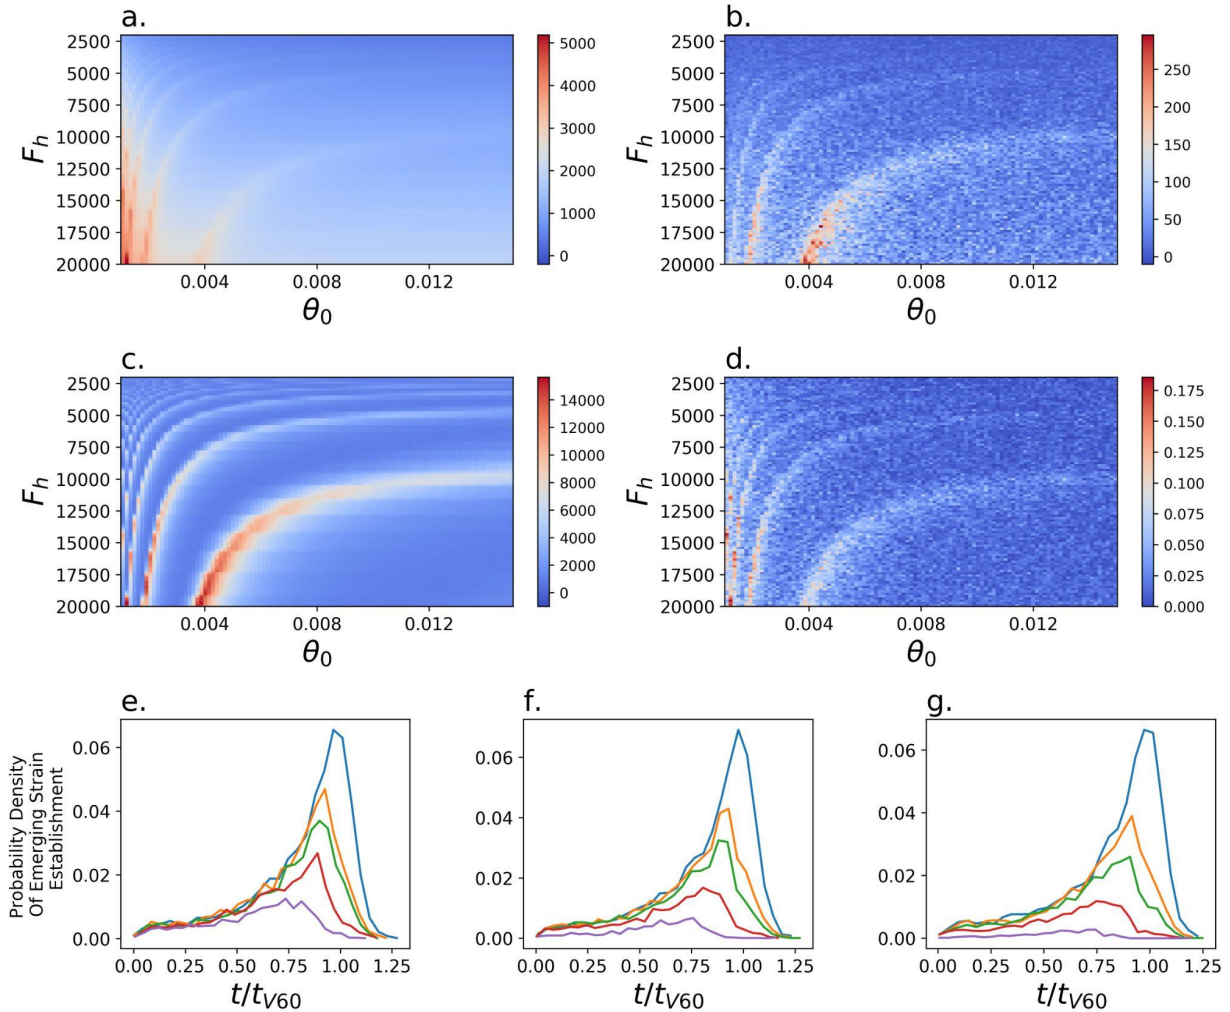

**Figure S2 Impact of the rate of vaccination and initiation of low rate of transmission on model dynamics for  $p = 10^{-7}$ .** The cumulative death rate from the **a**, wildtype and **b**, resistant strains, **c**, the number of wildtype-strain infected individuals at  $t_{v60}$ , the point in time when 60% of the population is vaccinated and **d**, the probability of resistant strain establishment. **e-g**, Probability density that the resistant strain emerges as a function of time since the start of the simulation,  $t$ , rescaled by the time at which 60% of the individuals are vaccinated,  $t_{v60}$ , summed across simulations with  $\theta$  (0.001 through 0.015),  $F_h$  (2,000 through 20,000). The impact of the extraordinary low transmission period centered at  $t/t_{v60} = 1$  on the likelihood of emergence of the resistant strain as a function of the duration of that period,  $T$  (colour-coded), and the intensity of the reduction of transmission **e**,  $\beta_i = 0.055$ , **f**,  $\beta_i = 0.03$ , **g**,  $\beta_i = 0.01$ .

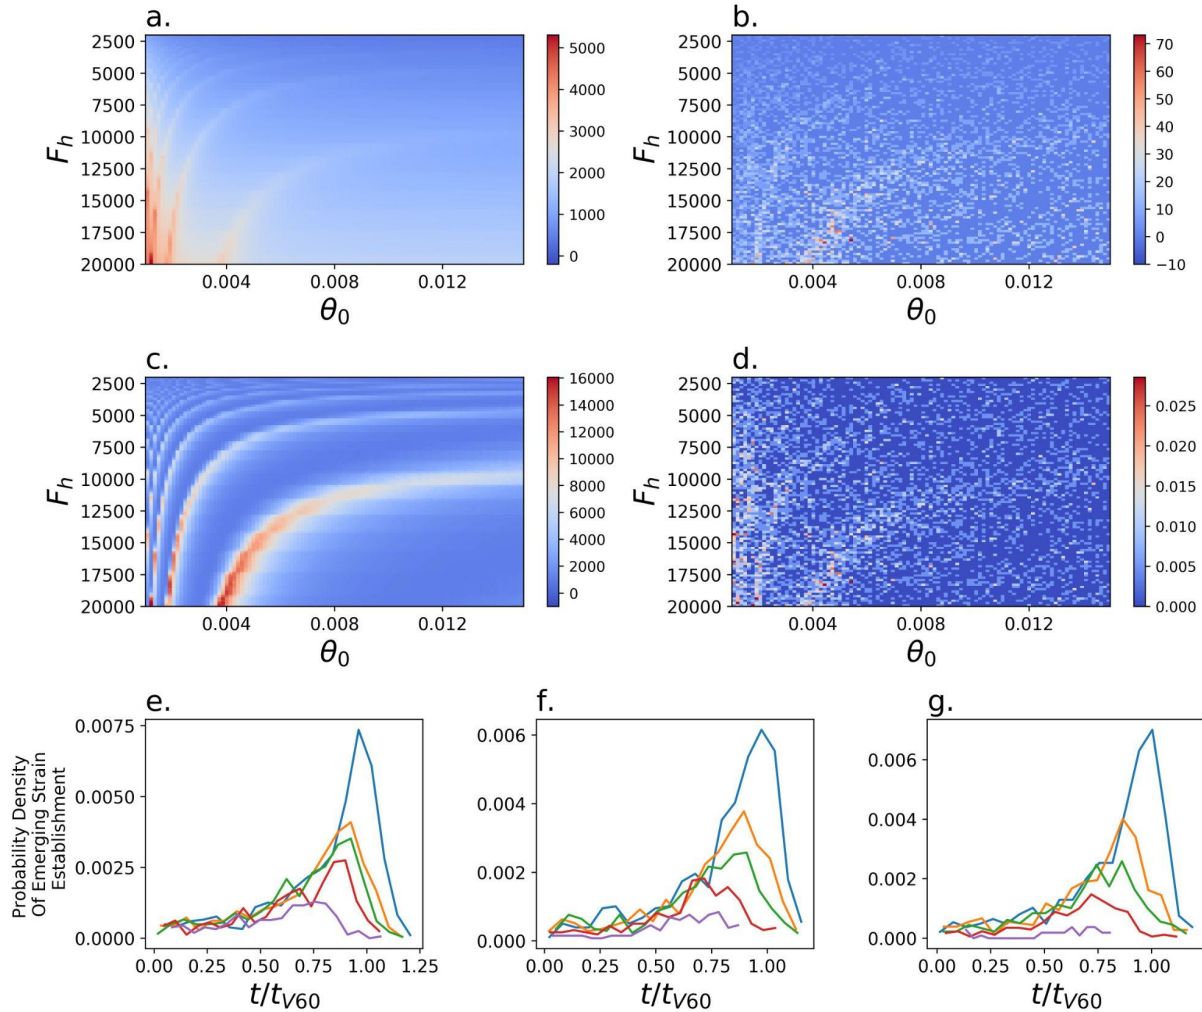

**Figure S3 Impact of the rate of vaccination and initiation of low rate of transmission on model dynamics for  $p = 10^{-8}$ .** The cumulative death rate from the **a**, wildtype and **b**, resistant strains, **c**, the number of wildtype-strain infected individuals at  $t_{v60}$ , the point in time when 60% of the population is vaccinated and **d**, the probability of resistant strain establishment. **e-g**, Probability density that the resistant strain emerges as a function of time since the start of the simulation,  $t$ , rescaled by the time at which 60% of the individuals are vaccinated,  $t_{v60}$ , summed across simulations with  $\theta$  (0.001 through 0.015),  $F_h$  (2,000 through 20,000). The impact of the extraordinary low transmission period centered at  $t/t_{v60} = 1$  on the likelihood of emergence of the resistant strain as a function of the duration of that period,  $T$  (colour-coded), and the intensity of the reduction of transmission **e**,  $\beta_i = 0.055$ , **f**,  $\beta_i = 0.03$ , **g**,  $\beta_i = 0.01$ .

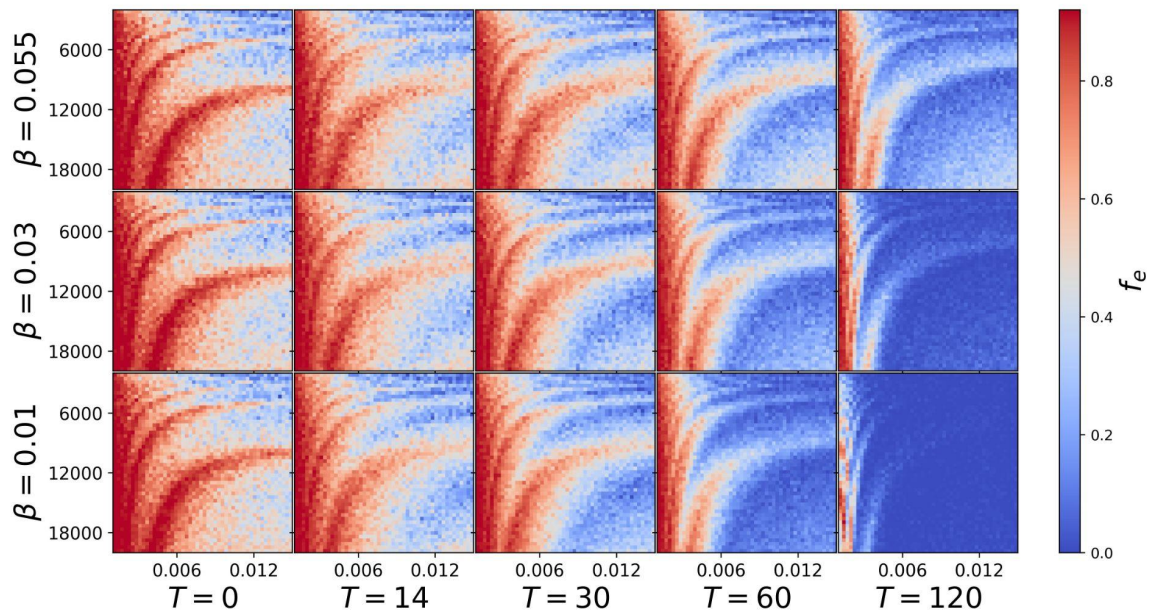

**Figure S4** The probability of establishment of the resistant strain for  $p = 10^{-5}$ . The influence of low transmission period centered at  $t/t_{v60} = 1$  on probability of establishment of the resistant strain as a function of the duration of that period,  $T$ , and the intensity of the reduction of transmission,  $\beta$ .

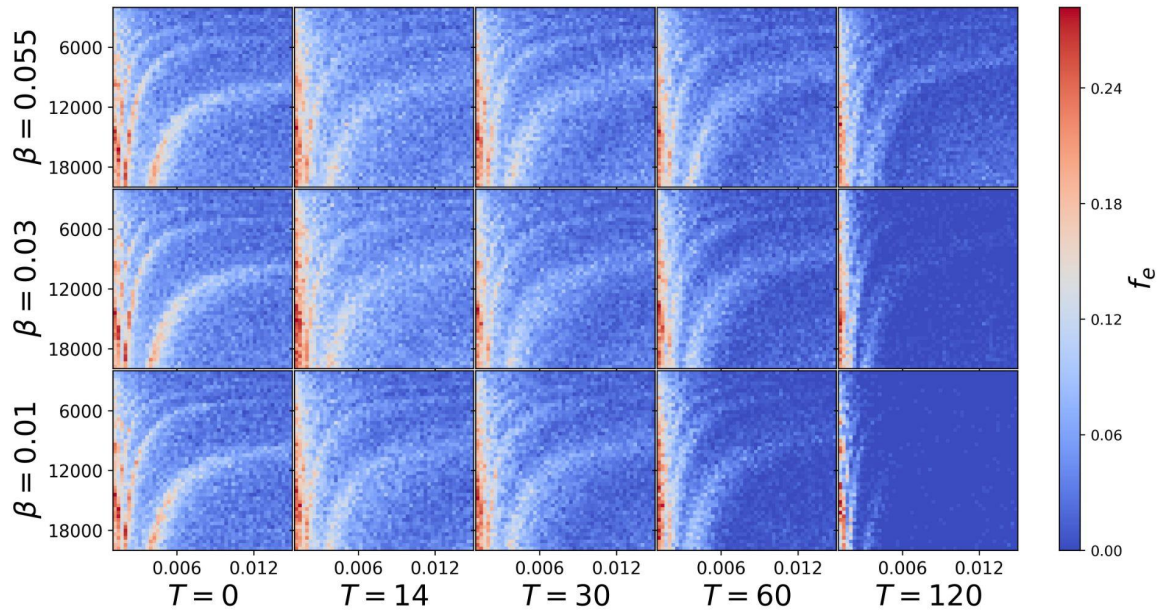

**Figure S5** The probability of establishment of the resistant strain for  $p = 10^{-6}$ . The influence of low transmission period centered at  $t/t_{v60} = 1$  on probability of establishment of the resistant strain as a function of the duration of that period,  $T$ , and the intensity of the reduction of transmission,  $\beta$ .

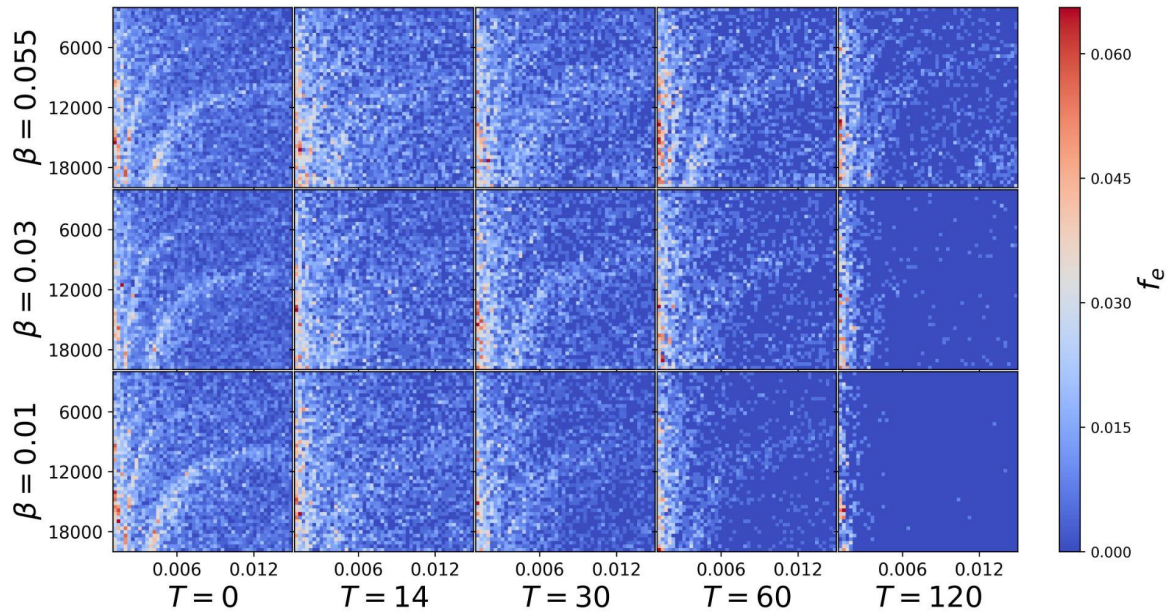

**Figure S6** The probability of establishment of the resistant strain for  $p = 10^{-7}$ . The influence of low transmission period centered at  $t/t_{v60} = 1$  on probability of establishment of the resistant

strain as a function of the duration of that period,  $T$ , and the intensity of the reduction of transmission,  $\beta$ .

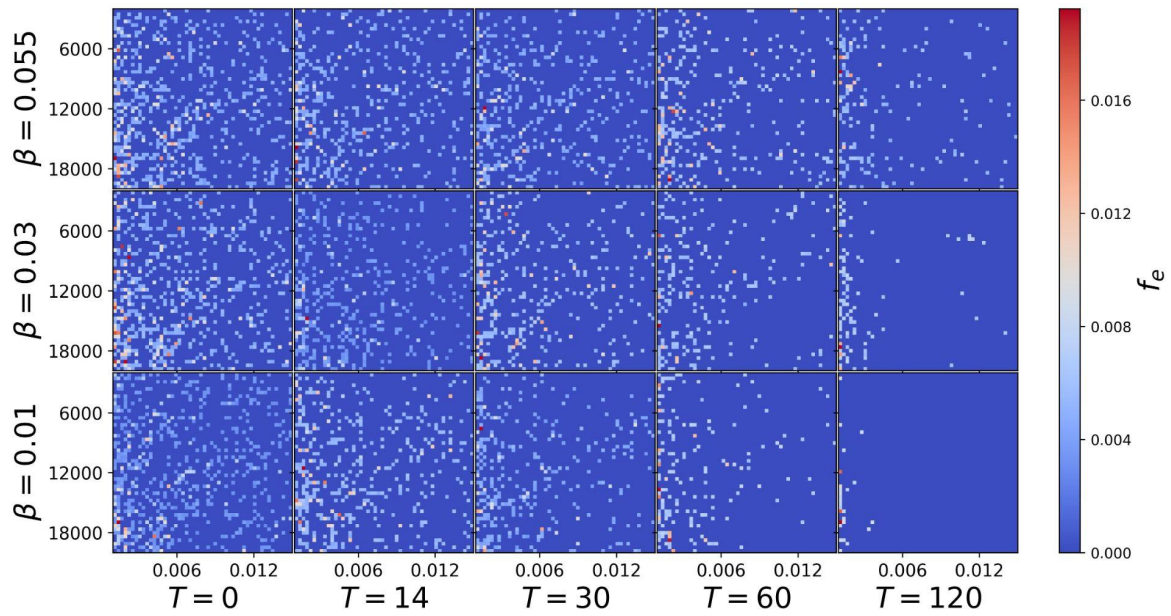

**Figure S7** The probability of establishment of the resistant strain for  $p = 10^{-8}$ . The influence of low transmission period centered at  $t/t_{v60} = 1$  on probability of establishment of the resistant strain as a function of the duration of that period,  $T$ , and the intensity of the reduction of transmission,  $\beta$ .



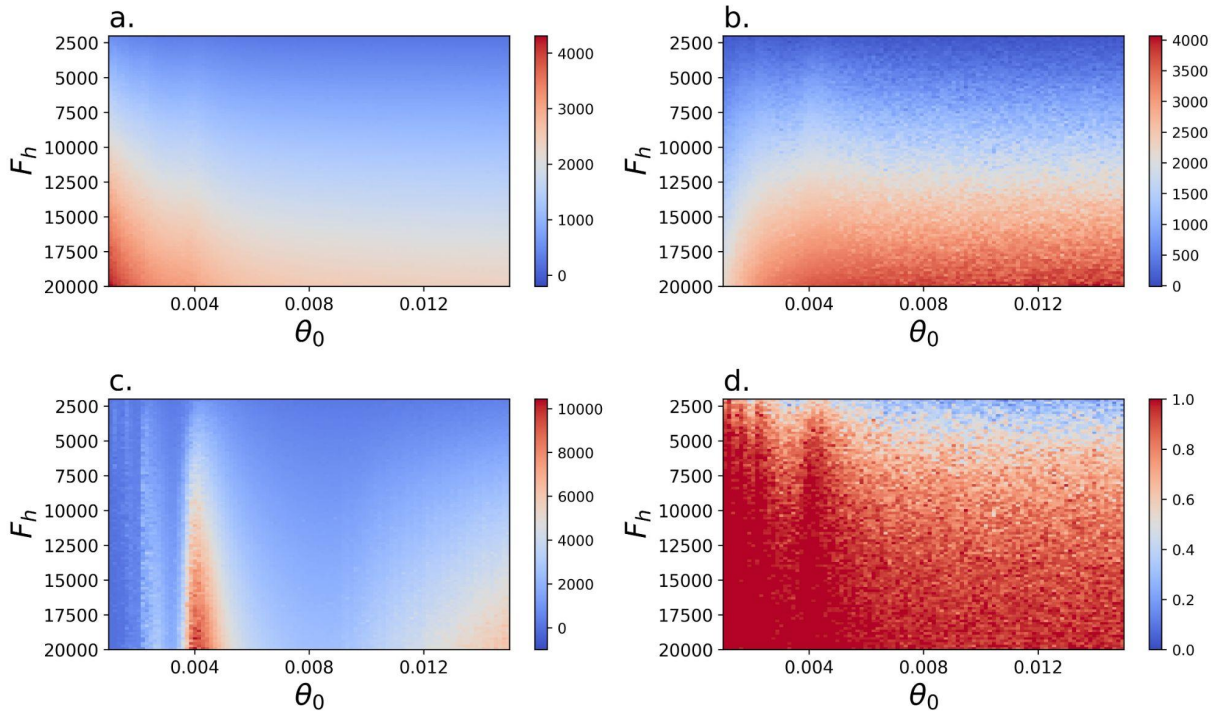

**Figure S8 Impact of the rate of vaccination and initiation of low rate of transmission on model dynamics for  $p = 10^{-5}$  and exit from low transmission at  $F_l = F_h/8$ . The cumulative death rate from the a, wildtype and b, resistant strains, c, the number of wildtype-strain infected individuals at  $t_{v60}$ , the point in time when 60% of the population is vaccinated and d, the probability of resistant strain establishment.**

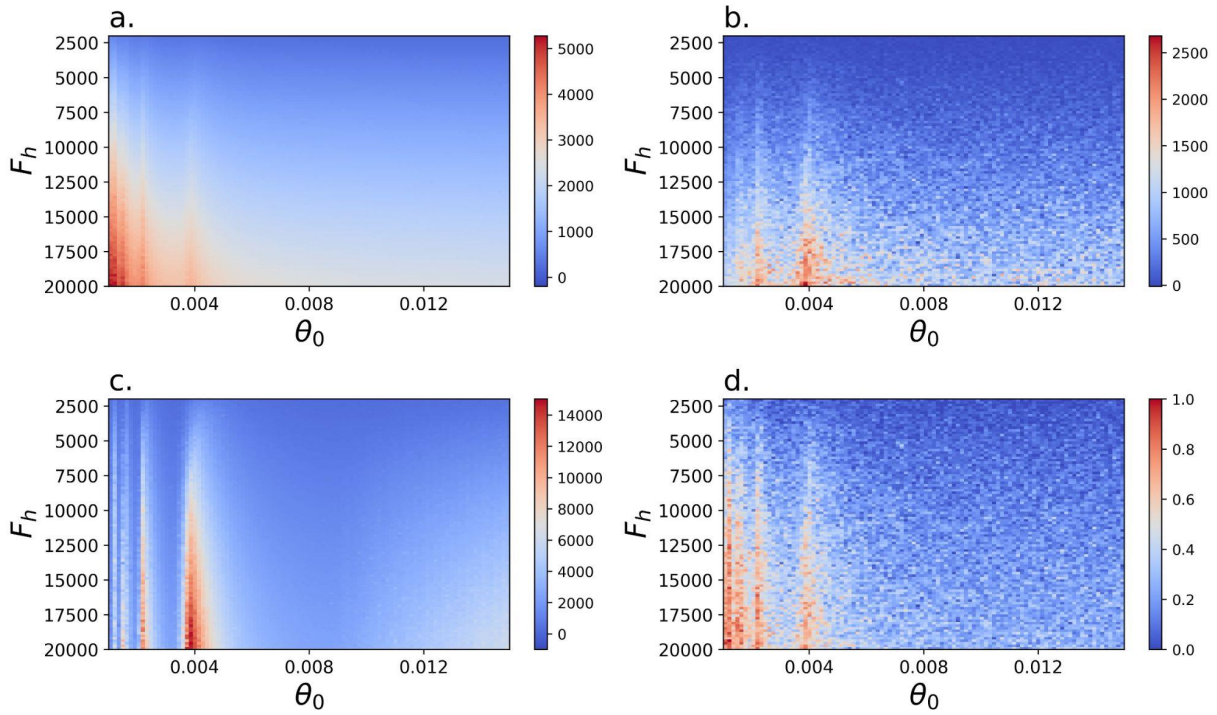

**Figure S9 Impact of the rate of vaccination and initiation of low rate of transmission on model dynamics for  $p = 10^{-6}$  and exit from low transmission at  $F_i = F_h/8$ .** The cumulative death rate from the a, wildtype and b, resistant strains, c, the number of wildtype-strain infected individuals at  $t_{v60}$ , the point in time when 60% of the population is vaccinated and d, the probability of resistant strain establishment.

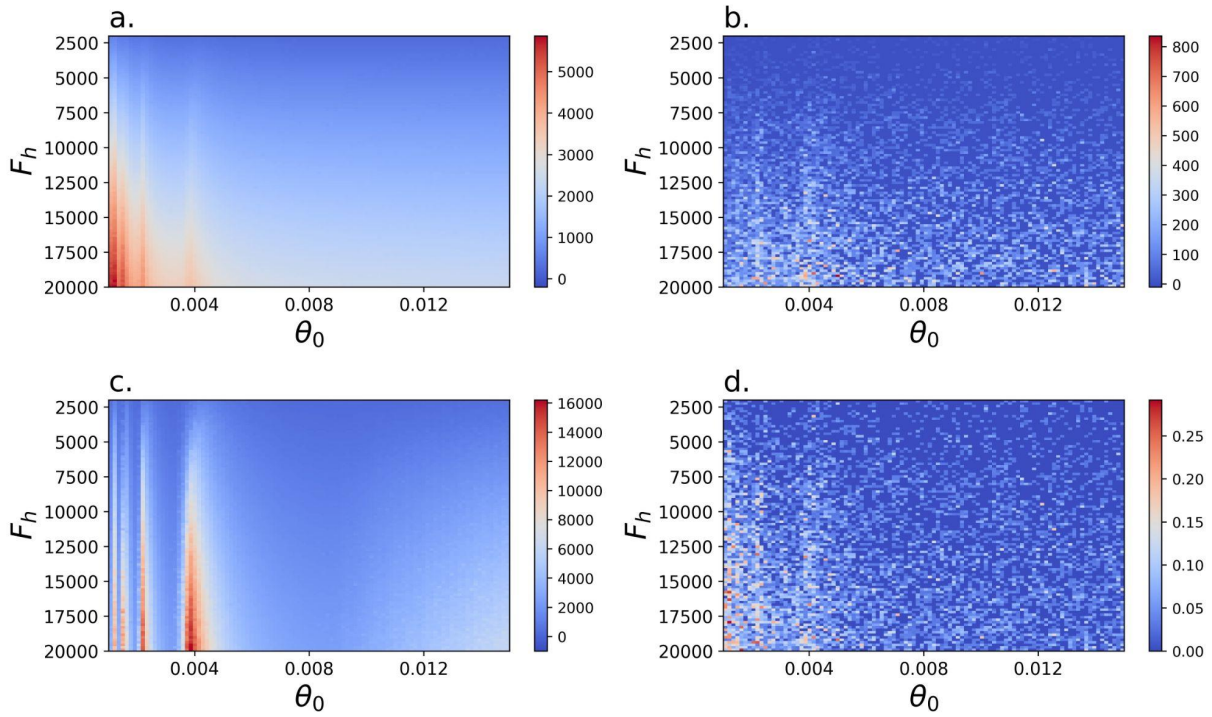

**Figure S10 Impact of the rate of vaccination and initiation of low rate of transmission on model dynamics for  $p = 10^{-7}$  and exit from low transmission at  $F_i = F_h/8$ .** The cumulative death rate from the **a**, wildtype and **b**, resistant strains, **c**, the number of wildtype-strain infected individuals at  $t_{v60}$ , the point in time when 60% of the population is vaccinated and **d**, the probability of resistant strain establishment.

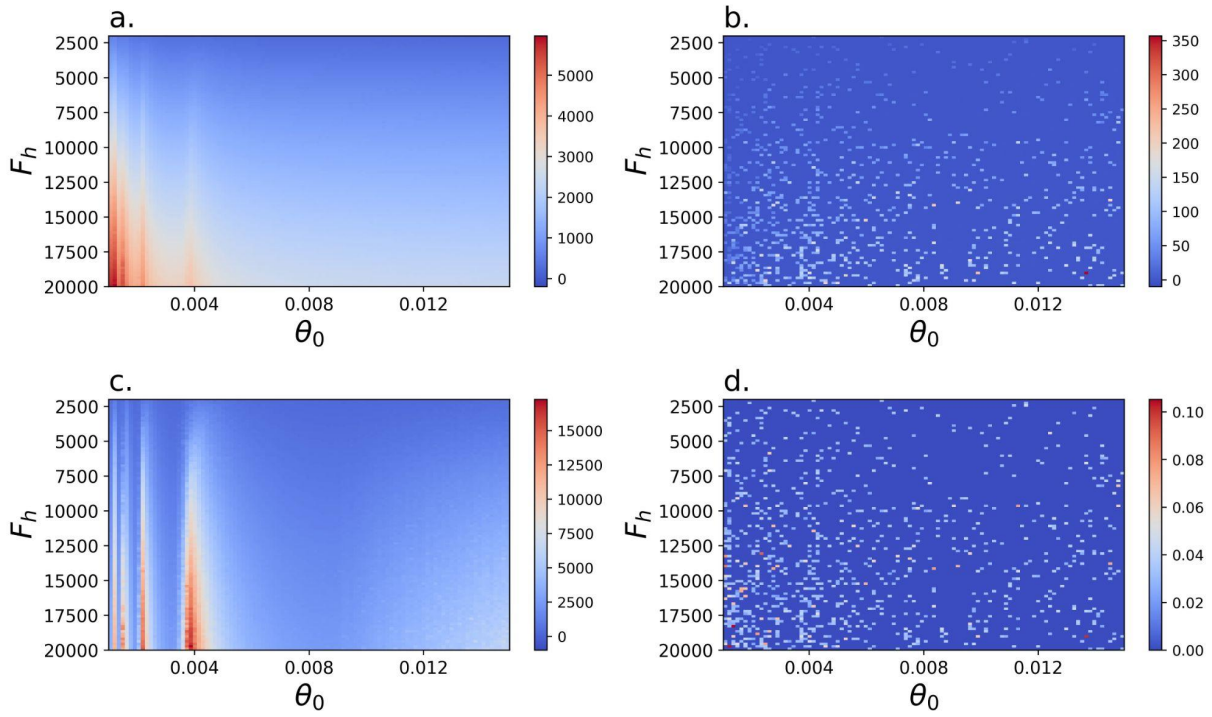

**Figure S11 Impact of the rate of vaccination and initiation of low rate of transmission on model dynamics for  $p = 10^{-8}$  and exit from low transmission at  $F_i = F_n/8$ . The cumulative death rate from the **a**, wildtype and **b**, resistant strains, **c**, the number of wildtype-strain infected individuals at  $t_{v60}$ , the point in time when 60% of the population is vaccinated and **d**, the probability of resistant strain establishment.**

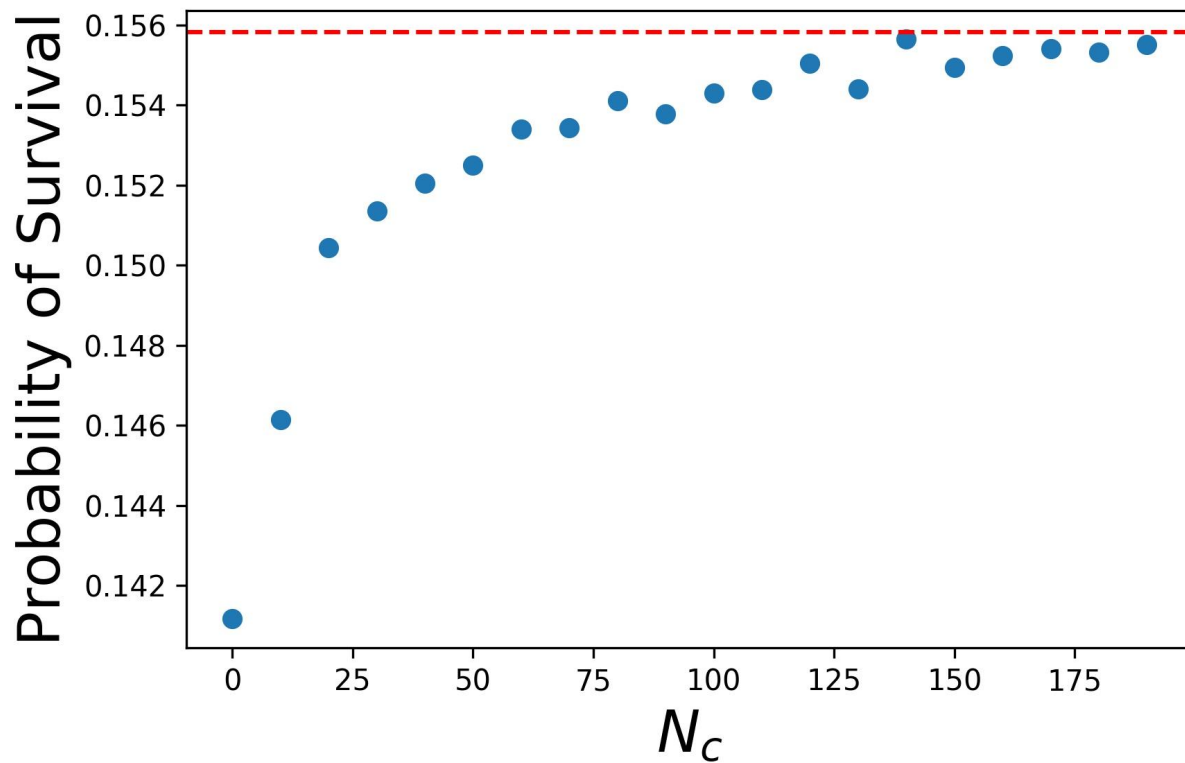

**Figure S12.** The fraction of surviving strains after  $T=200$  days in  $10^7$  runs, first initialized with  $I_{wt} = 200$  infected individuals. The red dashed line shows the expected fraction of surviving strains, as computed with **eq. 13**. The stochastic algorithm becomes exact, if no Tau Leaping is employed and instead the whole simulation is evaluated using the Gillespie SSA scheme.
